# Supplementary material for: Outcome Assessment of an Antipsychotic Drug Algorithm: Effects of the Mississippi State Hospital Algorithm Project
Source: Atypon-hosted journal article supplement (doi:10.1176/ps.62.8.pss6208_0963), 2011-08-01
Supplement: Crabtree_DS.pdf [file Crabtree_DS.pdf]

## Appendix

### Mississippi State Hospital

#### Antipsychotic Use Algorithm

**Step One:** Risperidone or ziprasidone

*Non-compliance:* Risperidone long-acting injection, or haloperidol decanoate, or fluphenazine decanoate, or risperidone syrup \*, or risperidone rapid dissolving tablets \*.

**Step Two:**

The antipsychotic agent not used from Step One; or aripiprazole, or quetiapine; or FGA monotherapy \*

**Step Three (a):**

SGA not previously tried; or  
SGA + FGA (Consider *low dose* of FGA); or  
olanzapine \*

**Step Three (b):** Clozapine

*Partial response to clozapine:* Consider clozapine + augmenting agent

*No response to, refusal of, or not candidate for, clozapine:* Consider another Step Three option, or go to Step Four

**Step Four:** SGA + FGA (if not used in Step Three (a))

**Step Five:** Maintenance therapy with a combination of 2 SGAs

\*: The specific clinical rationale for use of this option should be clearly documented in the medical progress notes. See notes below.

[FGA: First generation antipsychotic. SGA: Second generation antipsychotic (“atypical”)]
